# Supplementary material for: Effects of a Home-Based Lifestyle Intervention Program on Cardiometabolic Health in Breast Cancer Survivors during the COVID-19 Lockdown
Source: J Clin Med. 2021 Jun 17;10(12):2678. doi: 10.3390/jcm10122678 (PMC8235209; doi:10.3390/jcm10122678)
Supplement: Supplementary file 1 [file jcm-10-02678-s001.zip › Supplementary Table S1.pdf]

**Table S1.** Multivariate general linear model's  $F(p)$  values, which show the multivariate and univariate effects of the interaction between time (pre- and post-intervention) and study arm (intervention and control) on several representative parameters.

|                    | Multivariate  | Univariate post-hoc |               |               |               |                    |
|--------------------|---------------|---------------------|---------------|---------------|---------------|--------------------|
|                    |               | BMI                 | Glycemia      | Triglycerides | LDL           | $\dot{V}O_{2\max}$ |
| Interaction effect | 0.664 (0.655) | 2.721 (0.112)       | 1.223 (0.279) | 0.414 (0.526) | 0.640 (0.431) | 0.343 (0.563)      |

BMI, body mass index; LDL, low-density lipoprotein;  $\dot{V}O_{2\max}$ , maximal oxygen uptake.
